# Supplementary material
Source: Springer Nature journal article supplement (https://www.springermedizin.de/resource/supplementary/13020_2010_91_MOESM5_ESM.pdf/9640958)
Supplement: MOESM5 [file 9640958]

## EST, PM values before EA (X)

1 2 3 4 5 6 7

|   |        |  |          |          |          |          |  |
|---|--------|--|----------|----------|----------|----------|--|
| 7 |        |  |          |          | 21<br>22 |          |  |
| 6 |        |  |          |          |          |          |  |
| 5 |        |  | 10<br>19 |          |          | 22<br>21 |  |
| 4 |        |  | 8<br>12  | 17<br>15 |          |          |  |
| 3 |        |  | 5<br>5   | 13<br>9  | 20<br>11 |          |  |
| 2 |        |  | 2<br>2   |          |          |          |  |
| 1 | 1<br>1 |  |          |          |          |          |  |

EST, PM values after EA (Y)
